# Supplementary material for: A facile synthesis of CuFe2O4/Cu9S8/PPy ternary nanotubes as peroxidase mimics for the sensitive colorimetric detection of H2O2 and dopamine
Source: Royal Society of Chemistry journal article supplement (doi:10.1039/c7dt02355c), 2017-01-01
Supplement: c7dt02355c1.pdf [file c7dt02355c1.pdf]

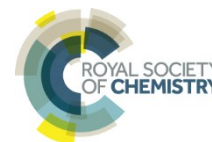

PAPER

## Electronic Supplementary Information (ESI) for

# A Facile Synthesis of $\text{CuFe}_2\text{O}_4/\text{Cu}_9\text{S}_8/\text{PPy}$ Ternary Nanotubes as Peroxidase Mimics for Sensitive Colorimetric Detection of $\text{H}_2\text{O}_2$ and Dopamine

Received 00th January 20xx,  
Accepted 00th January 20xx

DOI: 10.1039/x0xx00000x

[www.rsc.org/](http://www.rsc.org/)

Ze Zhou Yang,<sup>a</sup> Fuqiu Ma,<sup>b</sup> Yun Zhu,<sup>a</sup> Sihui Chen,<sup>a</sup> Ce Wang,<sup>a</sup> Xiaofeng Lu<sup>\*a</sup>

a. Alan G. MacDiarmid Institute, College of Chemistry, Jilin University, Changchun, 130012, P. R. China.

b. Fundamental Science of Nuclear Safety and Simulation Technology Laboratory, Harbin Engineering University, 150001, P. R. China.

**Corresponding Author:** xflu@jlu.edu.cn

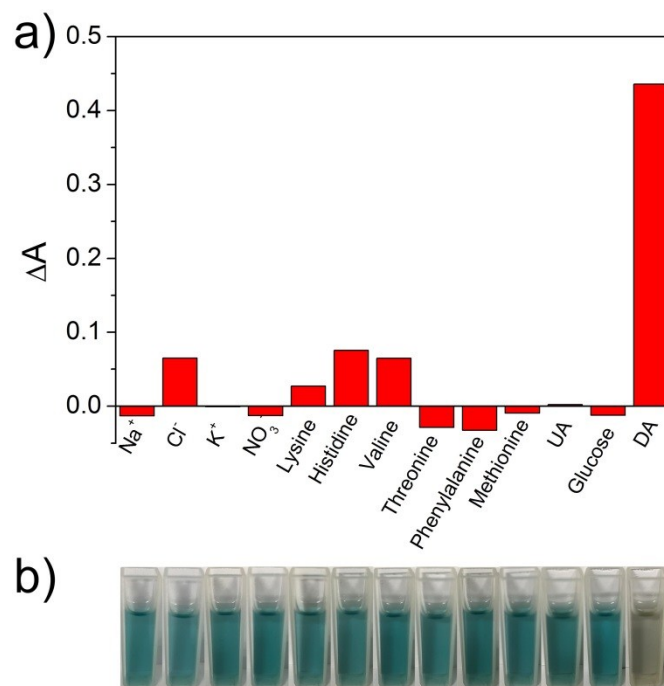

Figure S1. a) The absorbance difference between 0 min and 10 min at 650 nm of diverse systems involving constant concentrations of TMB (0.15 mM),  $\text{H}_2\text{O}_2$  (97.5 mM), catalyst suspension (20  $\mu\text{g}/\text{mL}$ ) with dopamine (1 mM) or other different interferents (1 mM); b) the photographs corresponding to the above systems on 10 min.

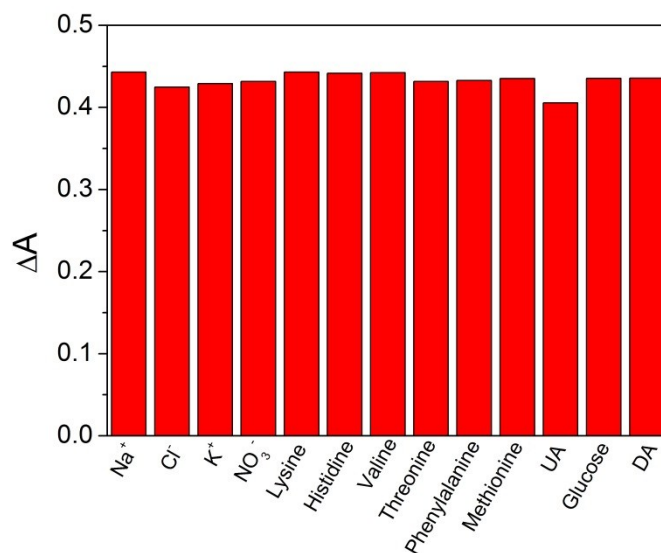

Figure S2. The difference between 0 min and 10 min of absorption at 650 nm in diverse solutions with the concentrations of TMB (0.15 mM),  $\text{H}_2\text{O}_2$  (97.5 mM), catalyst suspension (20  $\mu\text{g}/\text{mL}$ ) and dopamine (1 mM) fixed in the presence of different interferential materials (1 mM).
